# Supplementary material for: Engineering oxygen vacancies in CoO@Co3O4/C nanocomposites for enhanced electrochemical performances
Source: Royal Society of Chemistry journal article supplement (doi:10.1039/d1nr05747b), 2021-01-01
Supplement: d1nr05747b1.pdf [file d1nr05747b1.pdf]

## Appendix A. Supplementary data

### Engineering Oxygen Vacancies in CoO@Co<sub>3</sub>O<sub>4</sub>/C Nanocomposites for Enhanced Electrochemical Performances

Hongqi Chu <sup>a</sup>, Dan Zhang <sup>a</sup>, Panpan Feng <sup>a</sup>, Yulong Gu <sup>a</sup>, Pen Chen <sup>b</sup>, Kai Pan <sup>b</sup>, Haijiao Xie <sup>c</sup>, Min Yang <sup>a\*</sup>

<sup>a</sup> MIIT Key Laboratory of Critical Materials Technology for New Energy Conversion and Storage, School of Chemistry and Chemical Engineering, Harbin Institute of Technology, Harbin, 150001, PR China.

<sup>b</sup> Key Laboratory of Functional Inorganic Material Chemistry (MOE), School of Chemistry and Materials Science, Heilongjiang University, Harbin, 150080, China.

<sup>c</sup> Hangzhou Yanqu Information Technology Co., Ltd, Hangzhou 310003, China.

\*Corresponding author Email: [yangmin@hit.edu.cn](mailto:yangmin@hit.edu.cn)

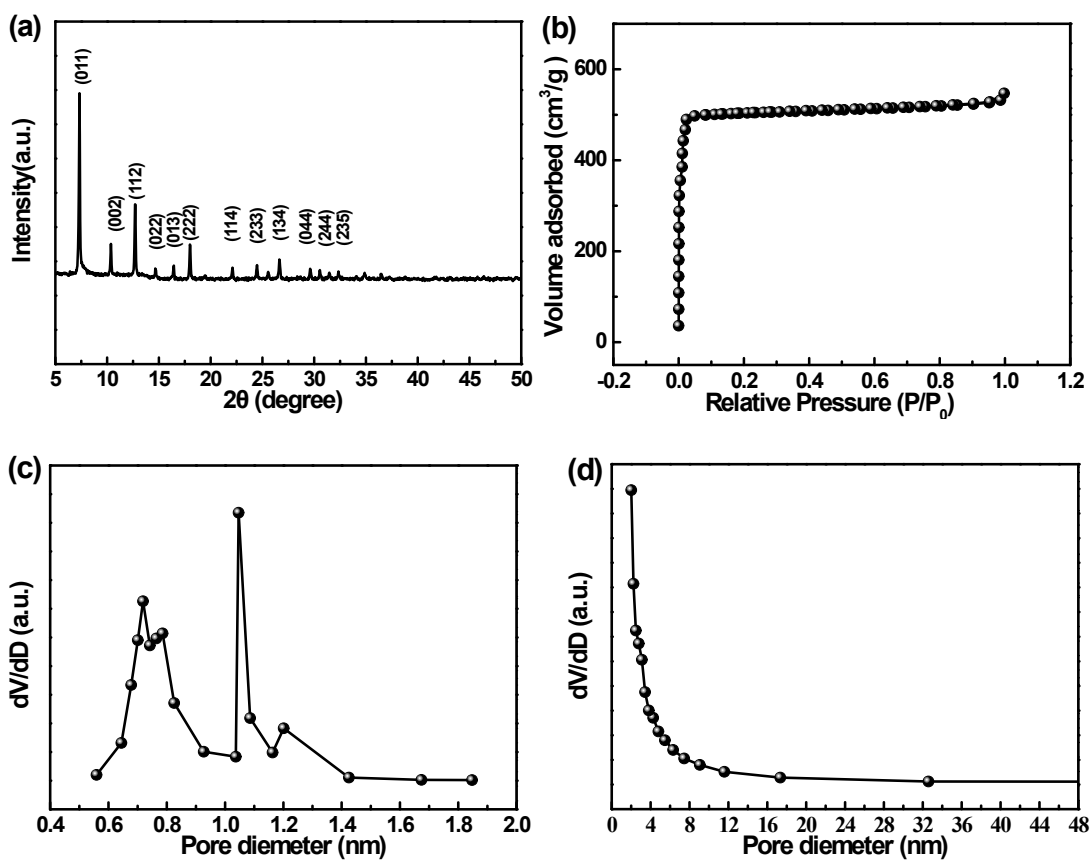

Fig. S1 (a) Powder XRD patterns of as-prepared ZIF-67; (b) Nitrogen adsorption and desorption isotherms for ZIF-67 at 77 K; Pore size distribution plots of ZIF-67: (c) Horvath-Kawazoe (HK) and (d) Barrett-Joyner-Halenda (BJH).

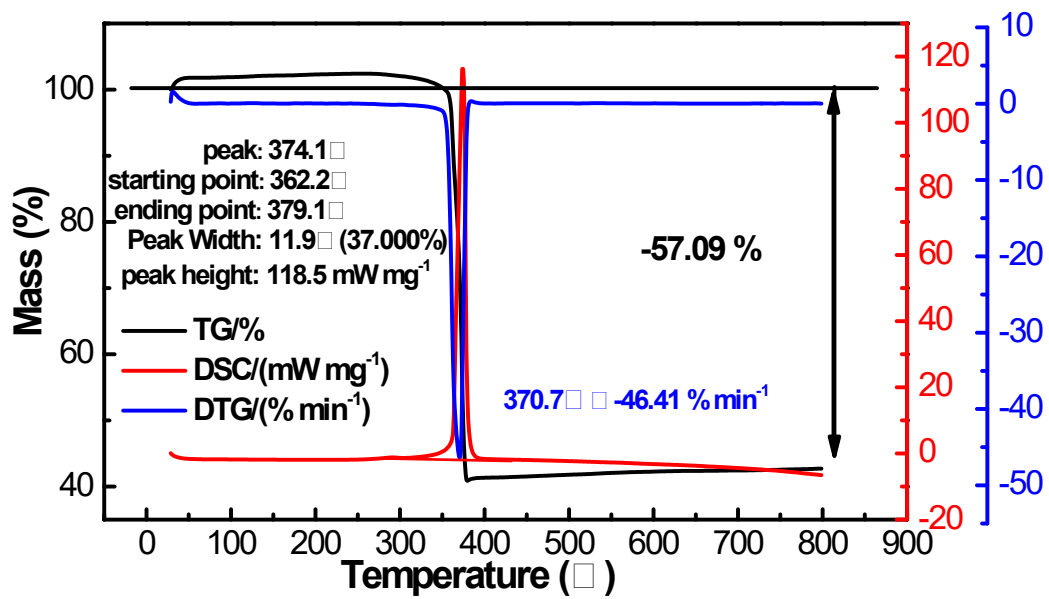

Fig. S2 Thermogravimetric curves of the ZIF-67 precursor.

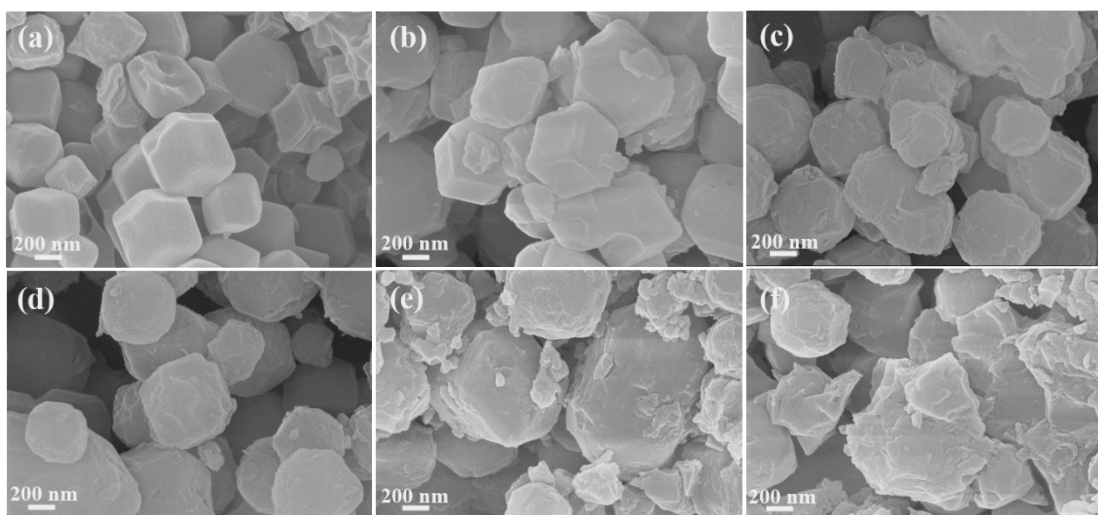

Fig. S3 SEM images of precursors treatment in different glucose concentration: (a) 2 mg mL<sup>-1</sup>

<sup>1</sup>; (b) 4 mg mL<sup>-1</sup>; (c) 6 mg mL<sup>-1</sup>; (d) 8 mg mL<sup>-1</sup>; (e) 10 mg mL<sup>-1</sup> and (f) 15 mg mL<sup>-1</sup>.

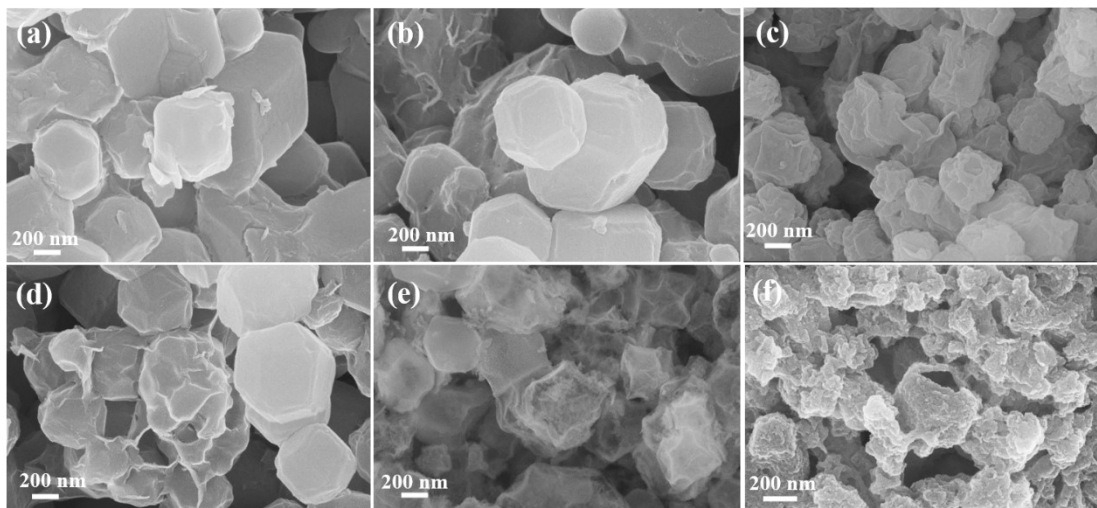

Fig. S4 SEM images of precursors treatment with different vacuum degrees in the heat treatment of Step II: (a) 2.4 mTorr; (b) 0.5 Torr; (c) 10 Torr; (d) 35 Torr; (e) 50 Torr and (f) 100 Torr.

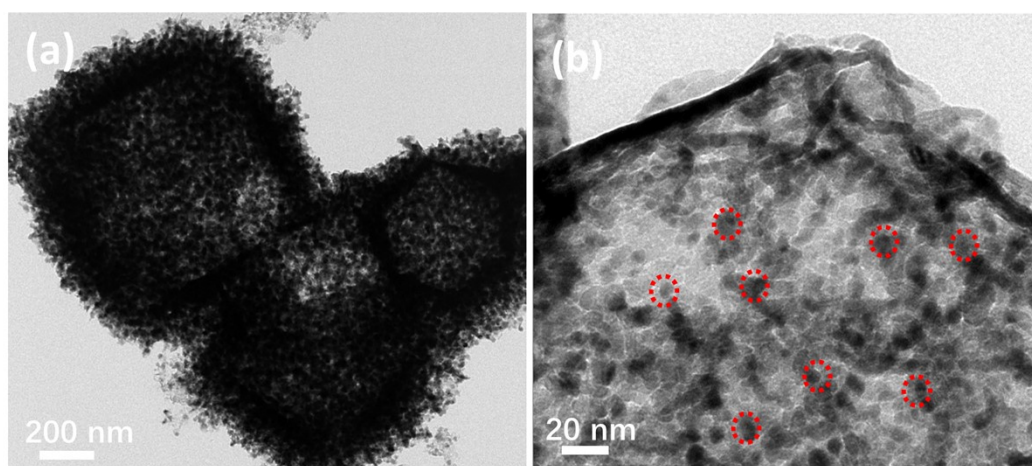

Fig. S5 HRTEM images of (a)  $\text{CoO}@ \text{Co}_3\text{O}_4/\text{C}$  and (b) the precursor after heat treatment in Step II for 0.5 h.

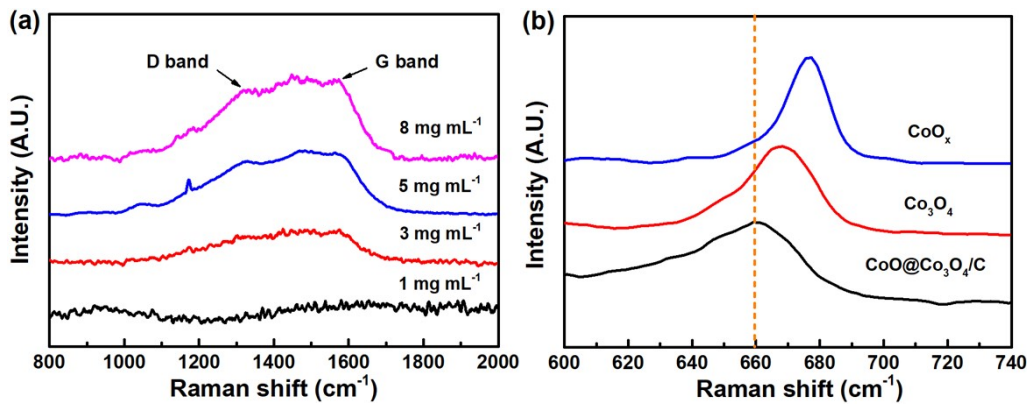

Fig. S6 Raman spectra of (a) precursors treatment in different concentrations of glucose and (b) CoO@Co<sub>3</sub>O<sub>4</sub>/C, CoO<sub>x</sub> and Co<sub>3</sub>O<sub>4</sub>.

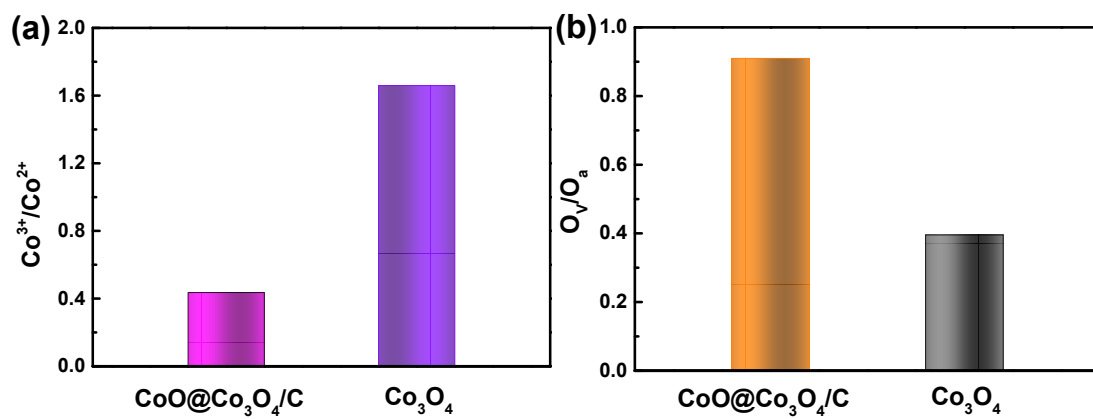

Fig. S7 (a) Co<sup>3+</sup>/Co<sup>2+</sup> values of CoO@Co<sub>3</sub>O<sub>4</sub>/C and Co<sub>3</sub>O<sub>4</sub>. (b) O<sub>v</sub>/O<sub>a</sub> values of CoO@Co<sub>3</sub>O<sub>4</sub>/C and Co<sub>3</sub>O<sub>4</sub> obtained from XPS results, this ratio represents the content of oxygen vacancy.

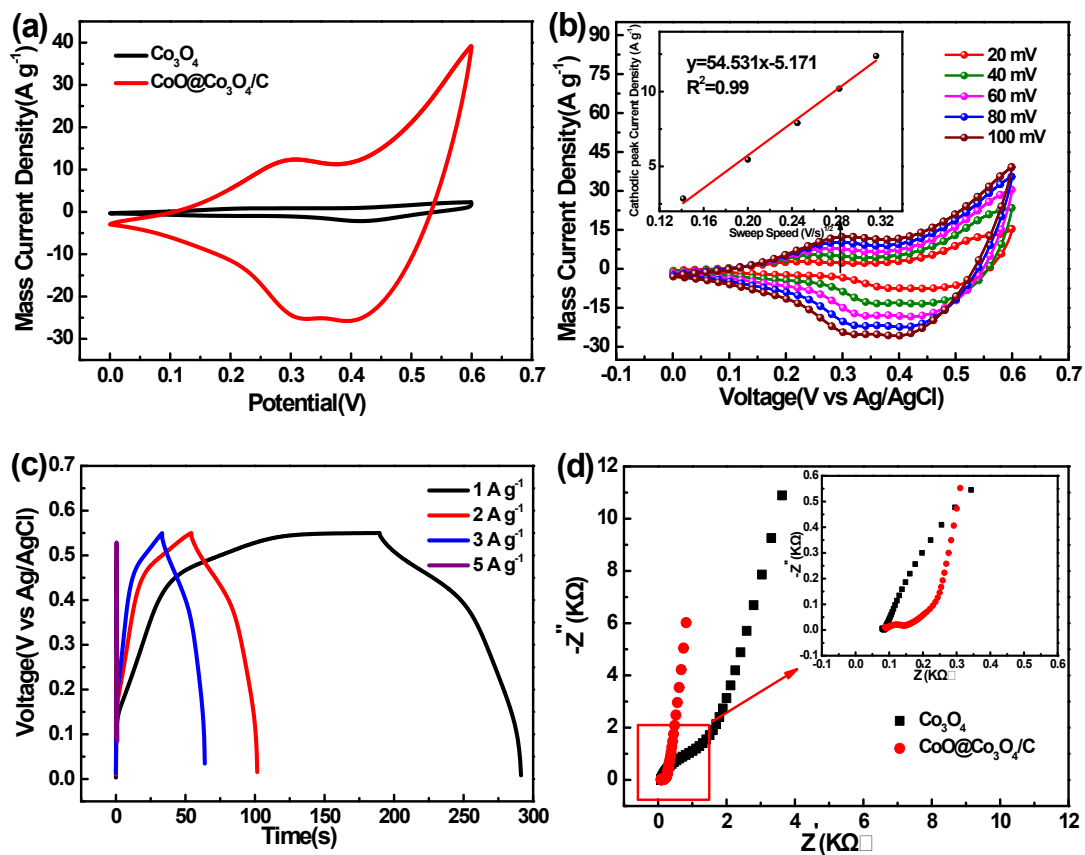

Fig. S8 Electrochemical performance of  $\text{Co}_3\text{O}_4$  and  $\text{CoO}@ \text{Co}_3\text{O}_4/\text{C}$ : (a) CV curves with scan rate of  $100 \text{ mV s}^{-1}$ ; (b) CV curves of  $\text{CoO}@ \text{Co}_3\text{O}_4/\text{C}$  with different scan rate between 10 and  $100 \text{ mV mVs}^{-1}$  (insert is diagram of the square root of anodic peak current and scanning rate); (c) Galvanostatic charge/discharge curves of  $\text{CoO}@ \text{Co}_3\text{O}_4/\text{C}$  with different current densities from 1 to  $5 \text{ A g}^{-1}$ ; (d) EIS Nyquist plots of  $\text{Co}_3\text{O}_4$  and  $\text{CoO}@ \text{Co}_3\text{O}_4/\text{C}$ .



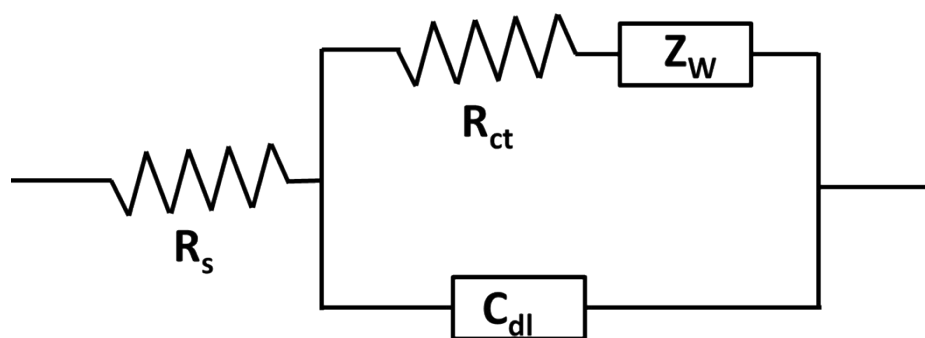

Fig. S9 Equivalent circuit diagram of  $\text{Co}_3\text{O}_4$  and  $\text{CoO@Co}_3\text{O}_4/\text{C}$ .

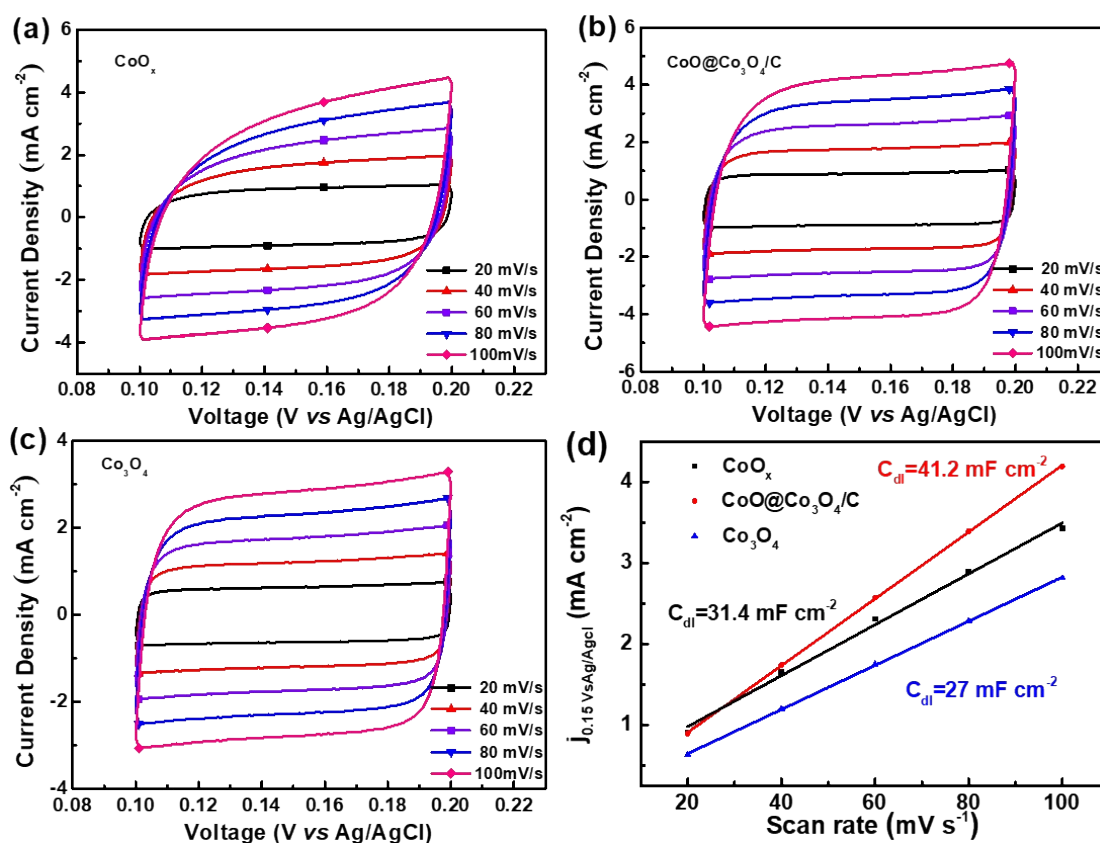

Fig. S10 Electrochemical measurements of the double-layer capacitance ( $C_{dl}$ ) of (a)  $\text{CoO}_x$ , (b)  $\text{CoO@Co}_3\text{O}_4/\text{C}$ , and (c)  $\text{Co}_3\text{O}_4$ ; (d) plots of the capacitive currents as a function of scan rate for  $\text{CoO}_x$ ,  $\text{CoO@Co}_3\text{O}_4/\text{C}$  and  $\text{Co}_3\text{O}_4$ .



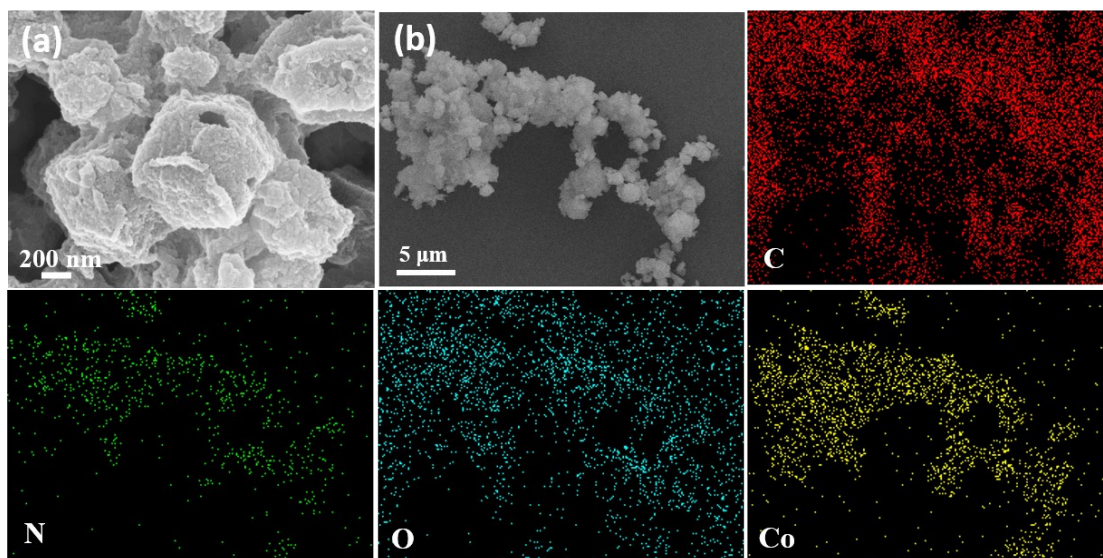

Fig. S11 SEM (a) and elemental mapping images (b) of CoO@Co<sub>3</sub>O<sub>4</sub>/C after a 30 h stability test in 1 mol L<sup>-1</sup> KOH.

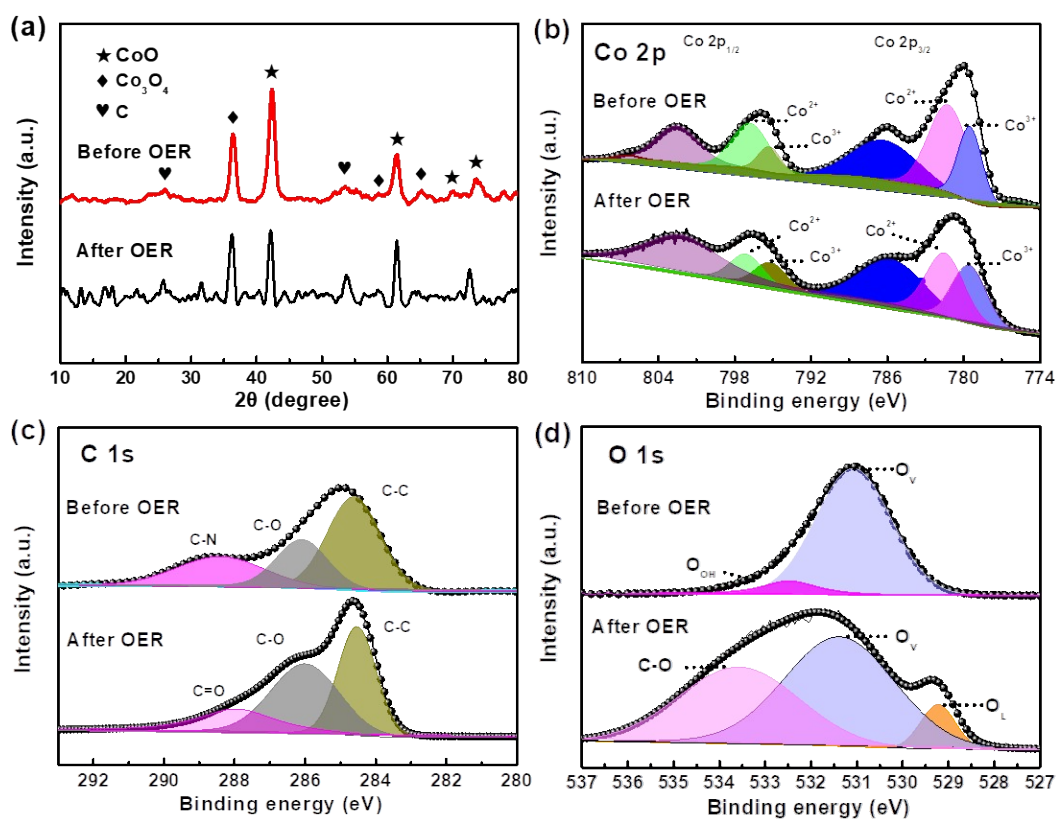

Fig. S12 (a) XRD patterns of CoO@Co<sub>3</sub>O<sub>4</sub>/C before and after long-time stability test. X-ray photoelectron spectra of CoO@Co<sub>3</sub>O<sub>4</sub>/C after long-time stability test: (b) Co2p; (c) C1s; (d) O1s; O<sub>v</sub> represents the oxygen vacancy; O<sub>L</sub> is the lattice oxygen of Co-O; O<sub>OH</sub> represents the oxygen in hydroxyl arise from physically oxygen species.

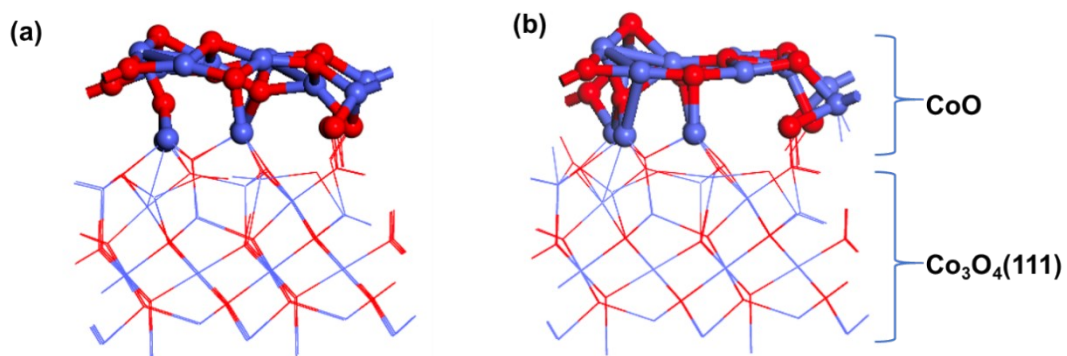

**Fig. S13.** The optimized structure (side view) of CoO@Co<sub>3</sub>O<sub>4</sub>/C (a) and CoO@Co<sub>3</sub>O<sub>4</sub>/C-O-vacancy (b).

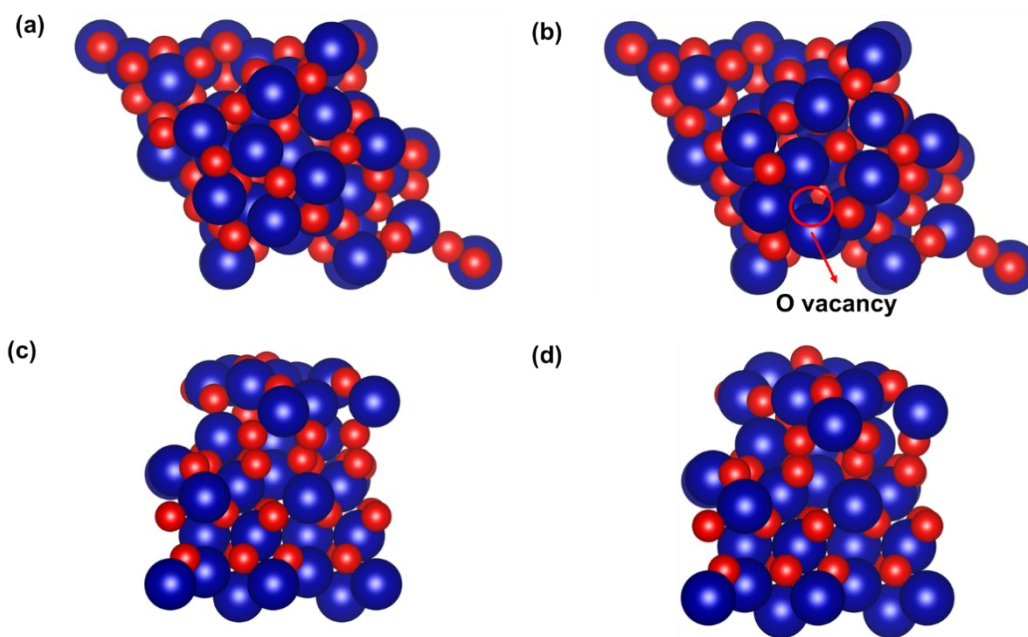

**Fig. S14.** Vesta display model of CoO@Co<sub>3</sub>O<sub>4</sub>/C and CoO@Co<sub>3</sub>O<sub>4</sub>/C-O-vacancy. The optimized structure of (a) CoO@Co<sub>3</sub>O<sub>4</sub>/C (top view); (b) CoO@Co<sub>3</sub>O<sub>4</sub>/C-O-

vacancy (top view); (c)  $\text{CoO}@Co_3O_4/C$  (side view), and (d)  $\text{CoO}@Co_3O_4/C\text{-O-vacancy}$  (side view).

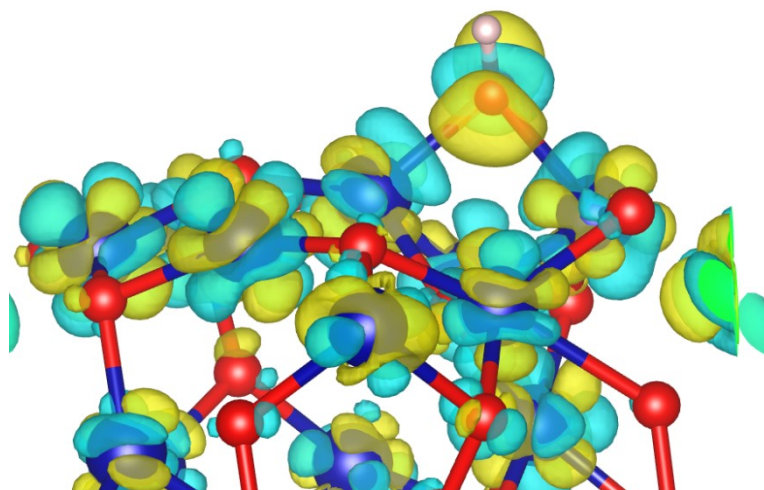

**Fig. S15.** Charge density difference of CoO@Co<sub>3</sub>O<sub>4</sub>/C with \*OH intermediate, where the isosurface value is set to be 0.01 e/Å and the yellow and cyan refer to the positive and negative charges, respectively.

**Table S1.** The specific surface area and pore diameter of different samples.

| Samples                                                  | ZIF-67 | CoO <sub>x</sub> | CoO@Co <sub>3</sub> O <sub>4</sub> /C | Co <sub>3</sub> O <sub>4</sub> |
|----------------------------------------------------------|--------|------------------|---------------------------------------|--------------------------------|
| Specific surface area (m <sup>2</sup> ·g <sup>-1</sup> ) | 1724.8 | 2311.1           | 188.5                                 | 110.7                          |
| Micropore diameter (nm)                                  | 1.05   | 0.72             | 1.68                                  | 1.67                           |
| Mesoporous diameter (nm)                                 | /      | 2.8              | 3.97                                  | 3.14                           |

**Table S2.** Comparison of OER activity for CoO@Co<sub>3</sub>O<sub>4</sub>/C and recently reported Co-based catalysts.

| Catalyst                                               | Loading density (mg cm <sup>-2</sup> ) | Overpotential at 10 mA cm <sup>-2</sup> (mV) | Tafel slope (mV dec <sup>-1</sup> ) | Substrate     | Reference                                                      |
|--------------------------------------------------------|----------------------------------------|----------------------------------------------|-------------------------------------|---------------|----------------------------------------------------------------|
| CoO@Co <sub>3</sub> O <sub>4</sub> /C                  | 0.269                                  | 287                                          | 75                                  | Glassy carbon | This work                                                      |
| Co <sub>2</sub> Mo <sub>3</sub> O <sub>8</sub> @NC-800 | 0.14                                   | 331                                          | 87.5                                | Glassy carbon | <i>Angew. Chem. Int. Ed.</i> <b>2020</b> , 59(29): 11948-11957 |
| Pd-e-NiCo-PBA-C                                        | 0.28                                   | 309                                          | 67                                  | Glassy carbon | <i>Adv. Funct. Mater.</i> , <b>2021</b> , 31(10): 2008989      |
| MXene/Co <sub>3</sub> O <sub>4</sub>                   | 0.407                                  | 300                                          | 118                                 | Glassy carbon | <i>Sci. Bull.</i> , <b>2020</b> , 65(6): 460-466               |



CoN

CoP-

TiO

x

CoP-

TiO

x

CoP-

0.2

337

72.1

Glassy  
carbon

*Small, 2020, 16(2):*  
1905075

TiO

x

CoP-

TiO

x

CoP/

# TiO

## X

### CoP/TiO<sub>x</sub>

|                                                       |       |       |      |                  |                                                                |
|-------------------------------------------------------|-------|-------|------|------------------|----------------------------------------------------------------|
| <b>Co<sub>2</sub>P/CoNPC</b>                          | 0.39  | 328   | 78   | Glassy<br>carbon | <i>Adv. Mater.</i> <b>2020</b> ,<br>32(36): 2003649            |
| <b>Co<sub>3</sub>O<sub>4</sub>/CeO<sub>2</sub></b>    | 0.4   | 270   | 51.9 | Glassy<br>carbon | <i>Adv. Mater.</i> <b>2019</b> , 31,<br>1900062                |
| <b>CoSAs-MoS<sub>2</sub>/TiN<br/>NRs</b>              | 50    | 340.6 | 95.1 | Carbon<br>cloth  | <i>Adv. Funct. Mater.</i> <b>2021</b> :<br>2100233             |
| <b>Co-Mo<sub>2</sub>C-CN<sub>x</sub>-2</b>            | 1.048 | 338   | 70   | Glassy<br>carbon | <i>Appl. Catal., B: Environ.</i><br><b>2021</b> , 284: 119738  |
| <b>Co<sub>3</sub>O<sub>3.87</sub>F<sub>0.13</sub></b> | 0.072 | 430   | 56   | Glassy<br>carbon | <i>Appl. Catal., B: Environ.</i><br><b>2021</b> , 281: 119535  |
| <b>PdCo-300</b>                                       | 0.455 | 350   | 50   | Glassy<br>carbon | <i>Appl. Catal., B: Environ.</i><br><b>2019</b> , 243: 175-182 |
| <b>Co<sub>3</sub>O<sub>4-x</sub></b>                  | 1.5   | 309   | 88   | Nickel<br>foam   | <i>J. Catal.</i> <b>2020</b> , 381: 395-<br>401                |
| <b>CoP/NCNHP</b>                                      | 0.39  | 310   | 70   | Glassy<br>carbon | <i>J. Am. Chem. Soc.</i> <b>2018</b> ,<br>140, 2610–2618       |
| <b>3D CoS<sub>0.46</sub>P<sub>0.54</sub></b>          | 0.354 | 302   | 67   | Glassy           | <i>Small Methods</i> <b>2020</b> ,                             |

---

|                           |      |     |    |                 |                                                     |
|---------------------------|------|-----|----|-----------------|-----------------------------------------------------|
|                           |      |     |    | carbon          | 4(7): 2000043                                       |
| <b>Co-MoO<sub>x</sub></b> | 0.28 | 340 | 49 | Carbon<br>cloth | <i>J. Mater. Chem. A</i> , <b>2019</b> ,<br>7, 1005 |

---
